# Supplementary material for: Computational Study on Selective PDE9 Inhibitors on PDE9-Mg/Mg, PDE9-Zn/Mg, and PDE9-Zn/Zn Systems
Source: MDPI journal article supplement (doi:10.3390/biom11050709), 2021-05-10
Supplement: s1 [file s1]

## Supplementary Information

# Computational Study on Selective PDE9 inhibitors on PDE9-Mg/Mg, PDE9-Zn/Mg, and PDE9-Zn/Zn systems

Dakshinamurthy Sivakumar<sup>1</sup>, Sathish-Kumar Mudedla<sup>1</sup>, Seonghun Jang<sup>1</sup>, Hyunjun Kim<sup>2</sup>, Hyunjin Park<sup>2</sup>, Yong-won Choi<sup>2</sup>, Joongyo Oh<sup>2</sup> and Sangwook Wu<sup>1,\*</sup>

<sup>1</sup> R&D Center, Pharmcadd, 221, 17 APEC-ro, Haeundae-gu, Busan 48060, Republic of Korea

<sup>2</sup> R&D Center, Huons co. Ltd., Ansan-si, Gyeonggi-do, 15588, Republic of Korea

\*Correspondence: s.wu@pharmacadd.com; Tel.: 82-51-731-5688

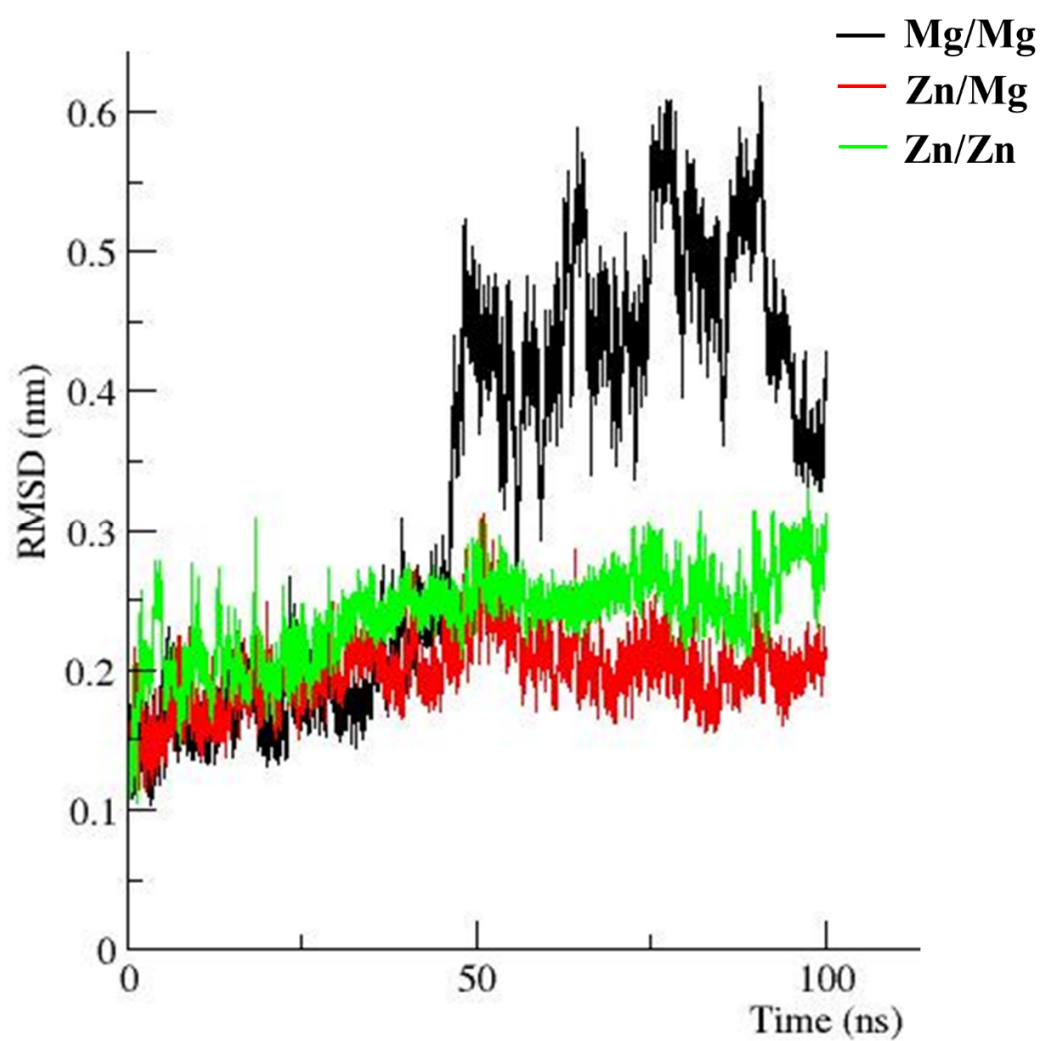

**Figure**  
Figure S1. C-alpha RMSD plot of PDE-9 (Mg/Mg, Zn/Mg, Zn/Zn) in complexed with compound-1R.

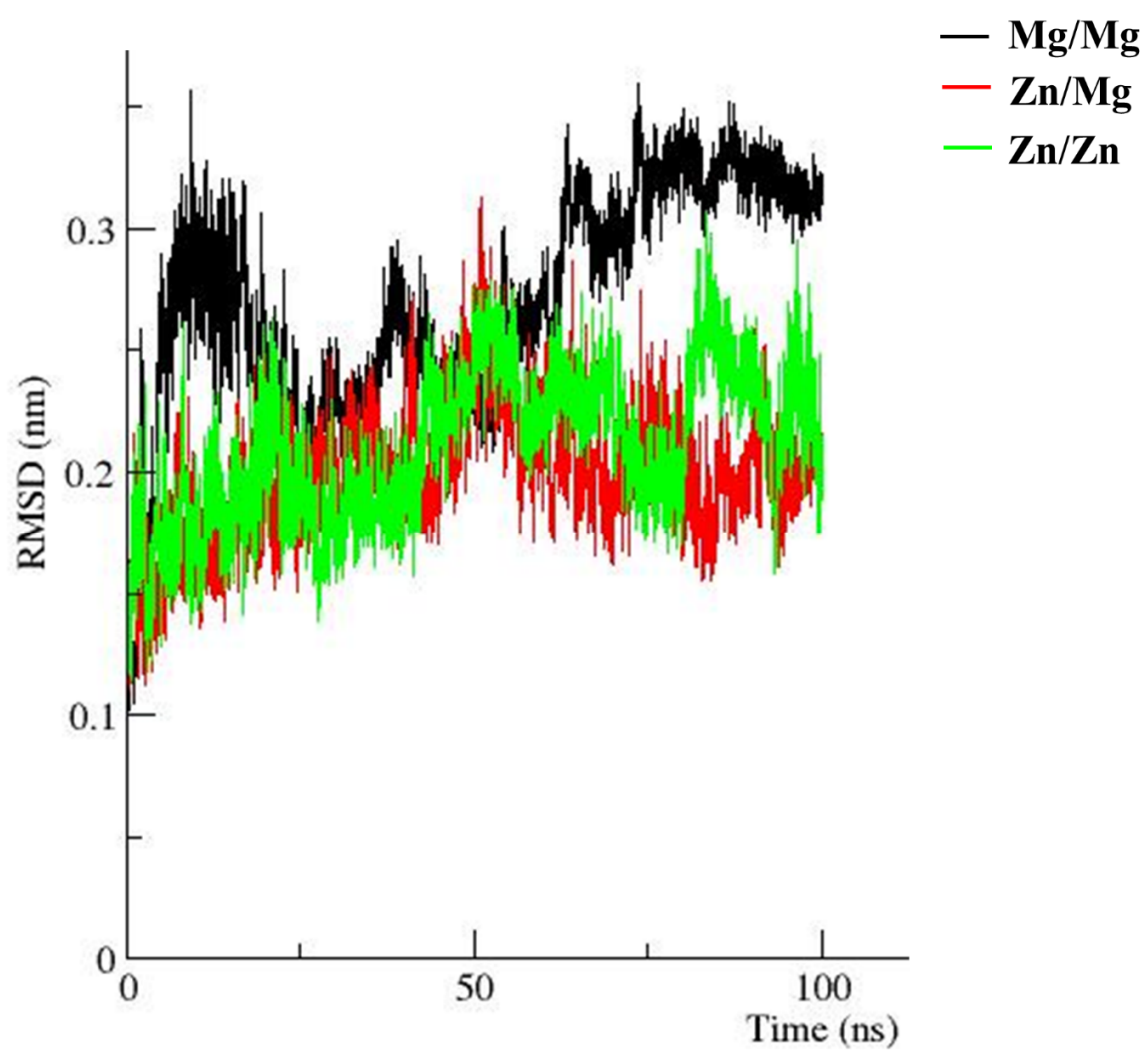

Figure S2. C-alpha RMSD plot of PDE-9 (Mg/Mg, Zn/Mg, Zn/Zn) in complexed with compound-1S.

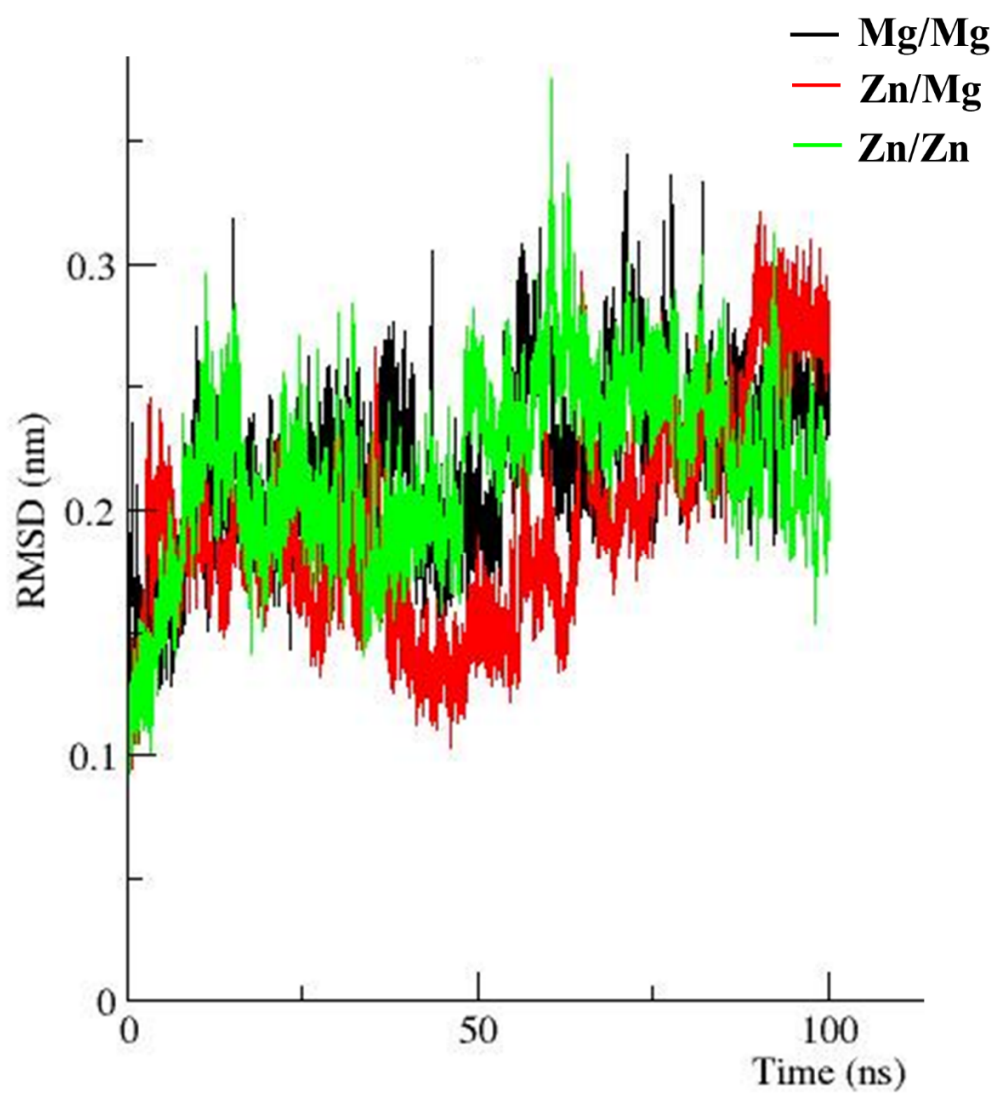

Figure S3.

Figure S3. C-alpha RMSD plot of PDE-9 (Mg/Mg, Zn/Mg, Zn/Zn) in complexed with compound-2R.



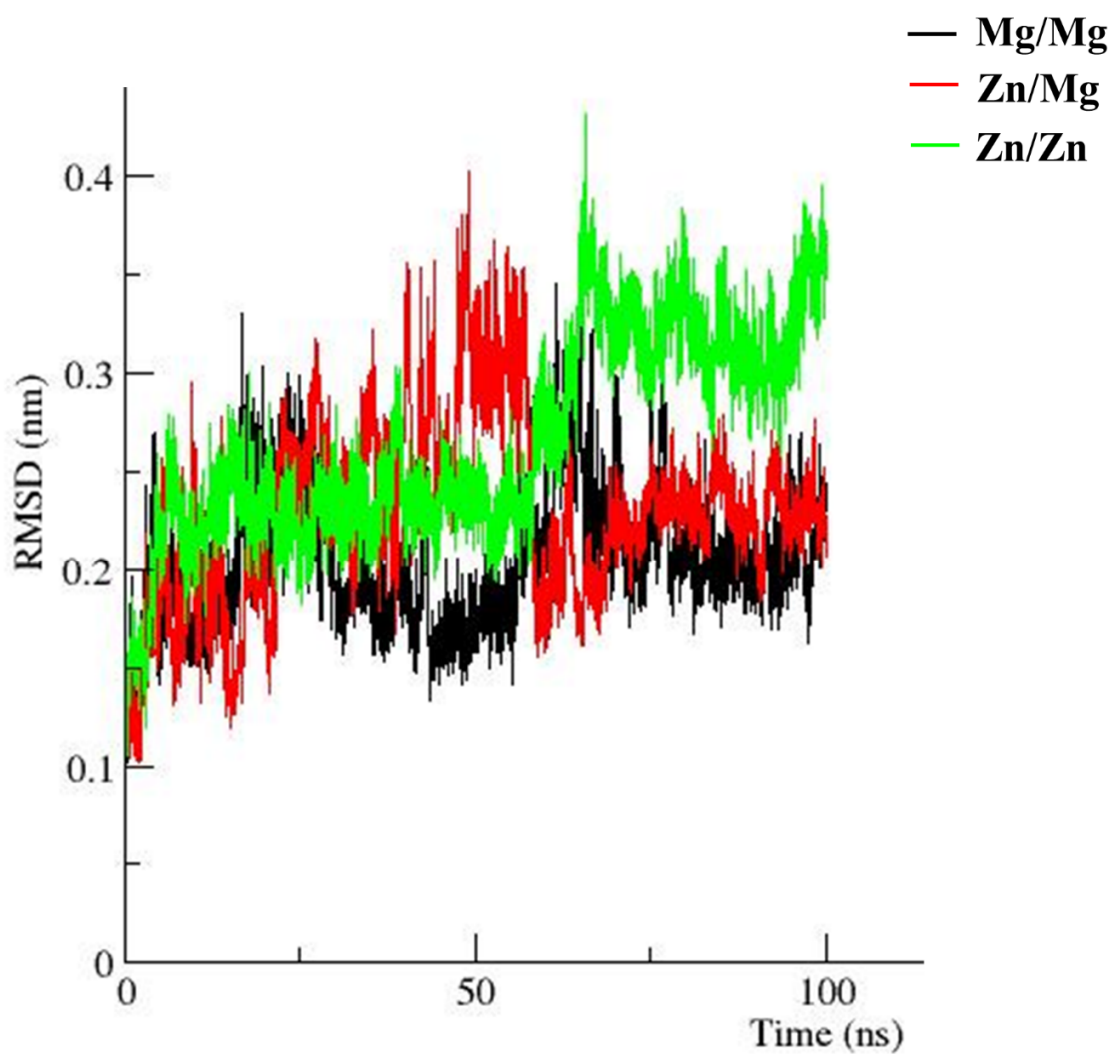

**Figure S4. C-alpha RMSD plot of PDE-9 (Mg/Mg, Zn/Mg, Zn/Zn) in complexed with compound-2S.**

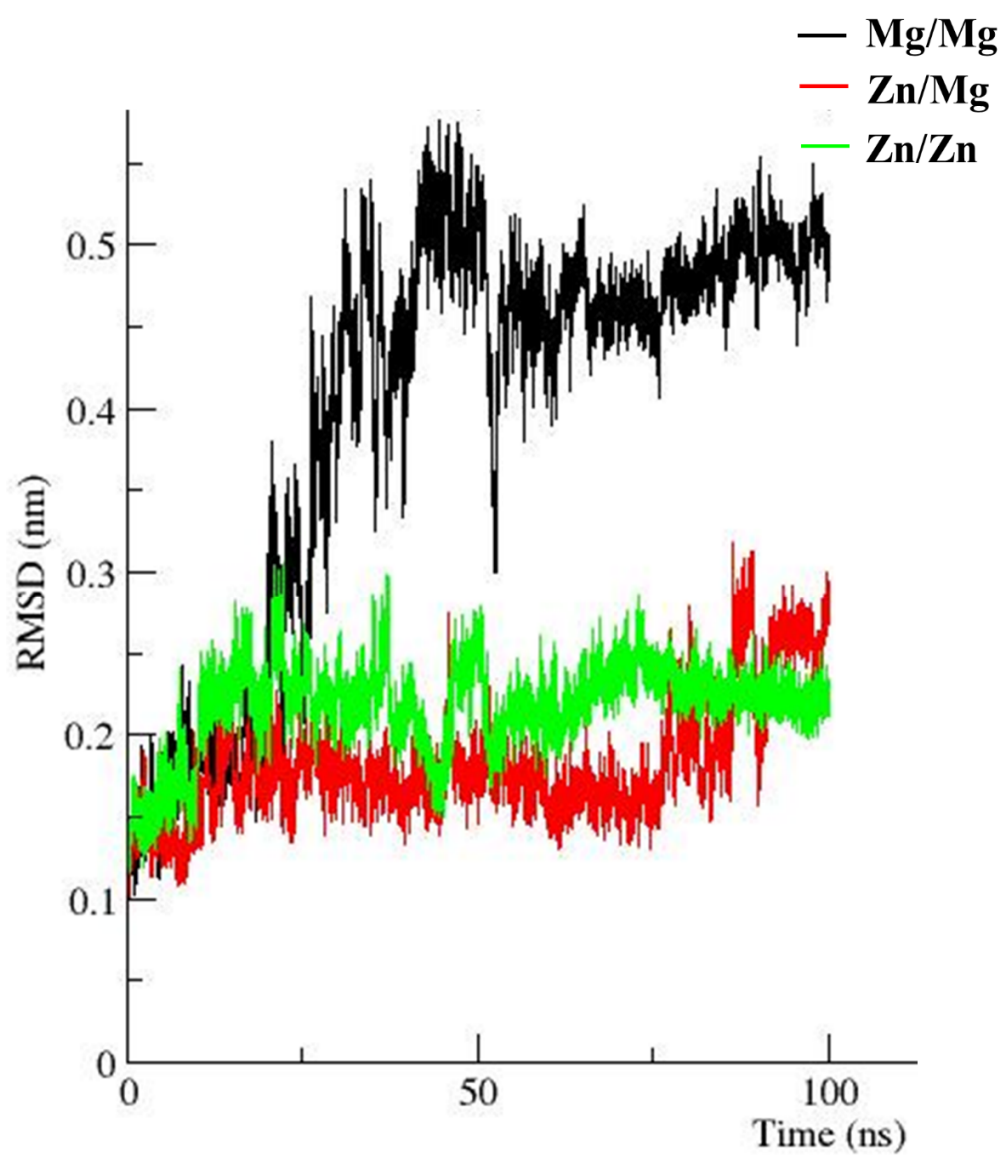

Figure S5.

Figure S5. C-alpha RMSD plot of PDE-9 (Mg/Mg, Zn/Mg, Zn/Zn) in complexed with compound-3R.

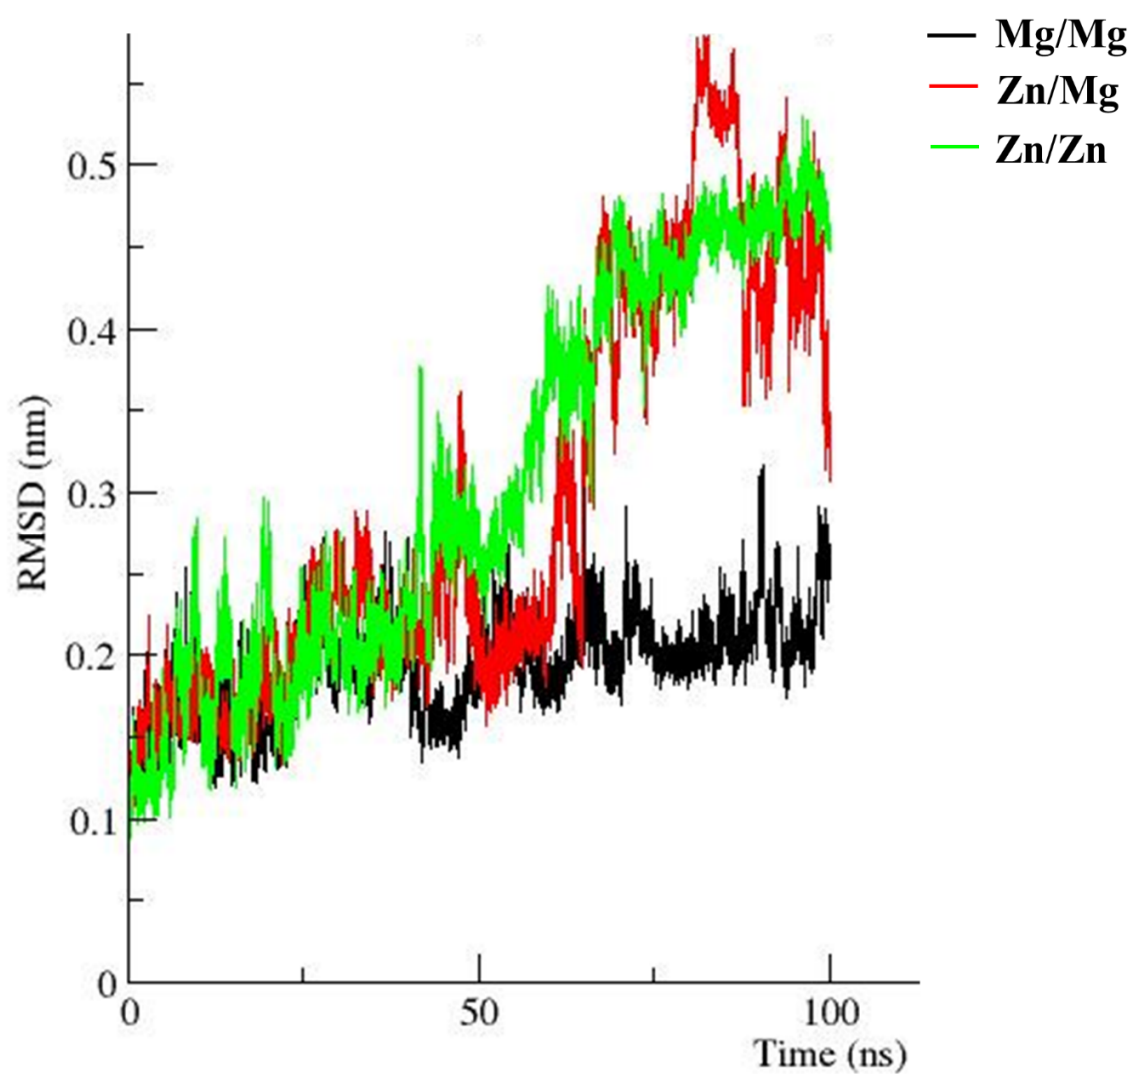

Figure S6. C-alpha RMSD plot of PDE-9 (Mg/Mg, Zn/Mg, Zn/Zn) in complexed with compound-3S.

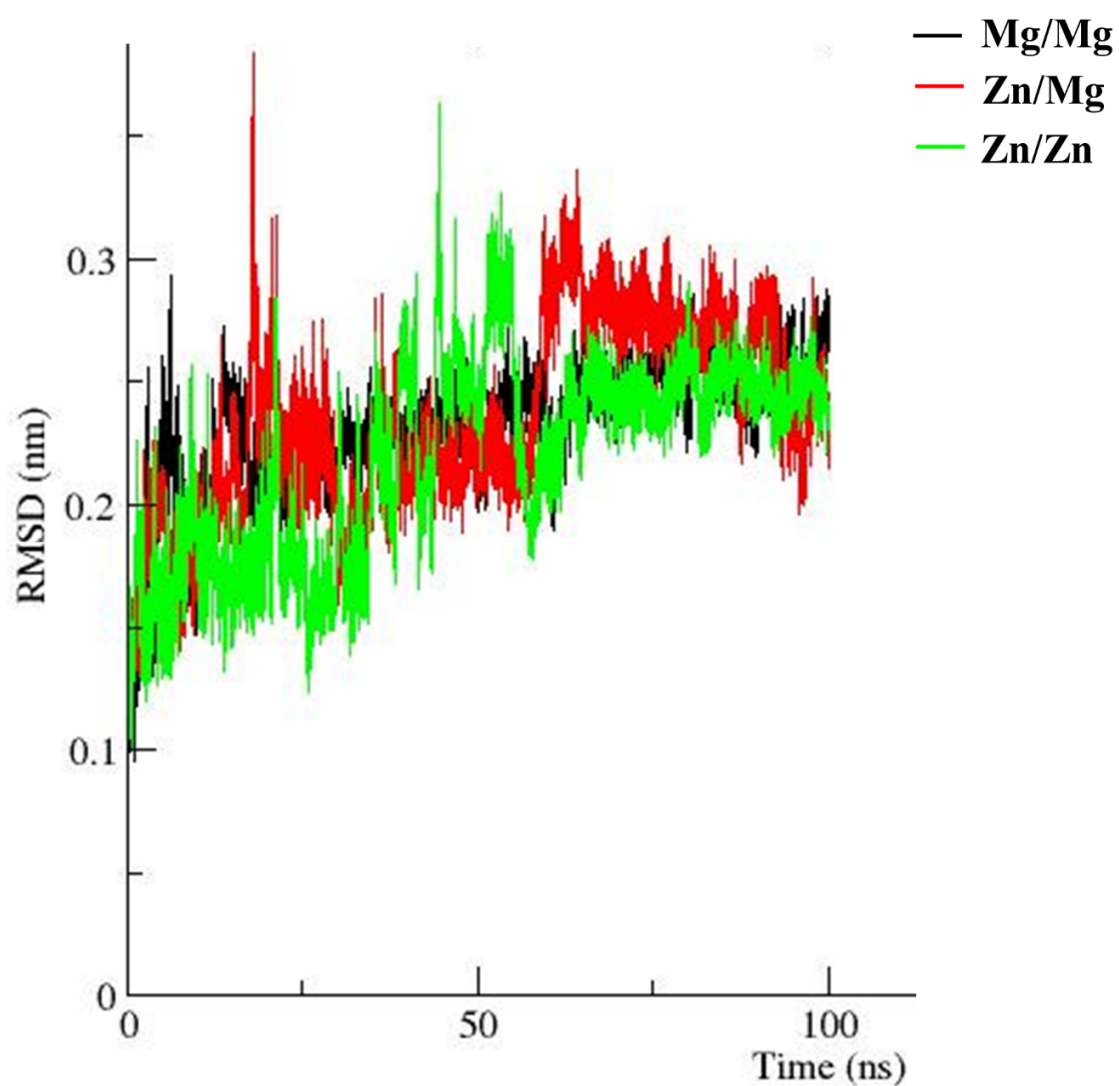

**Figure S7. C-alpha RMSD plot of PDE-9 (Mg/Mg, Zn/Mg, Zn/Zn) in complexed with compound-4.**

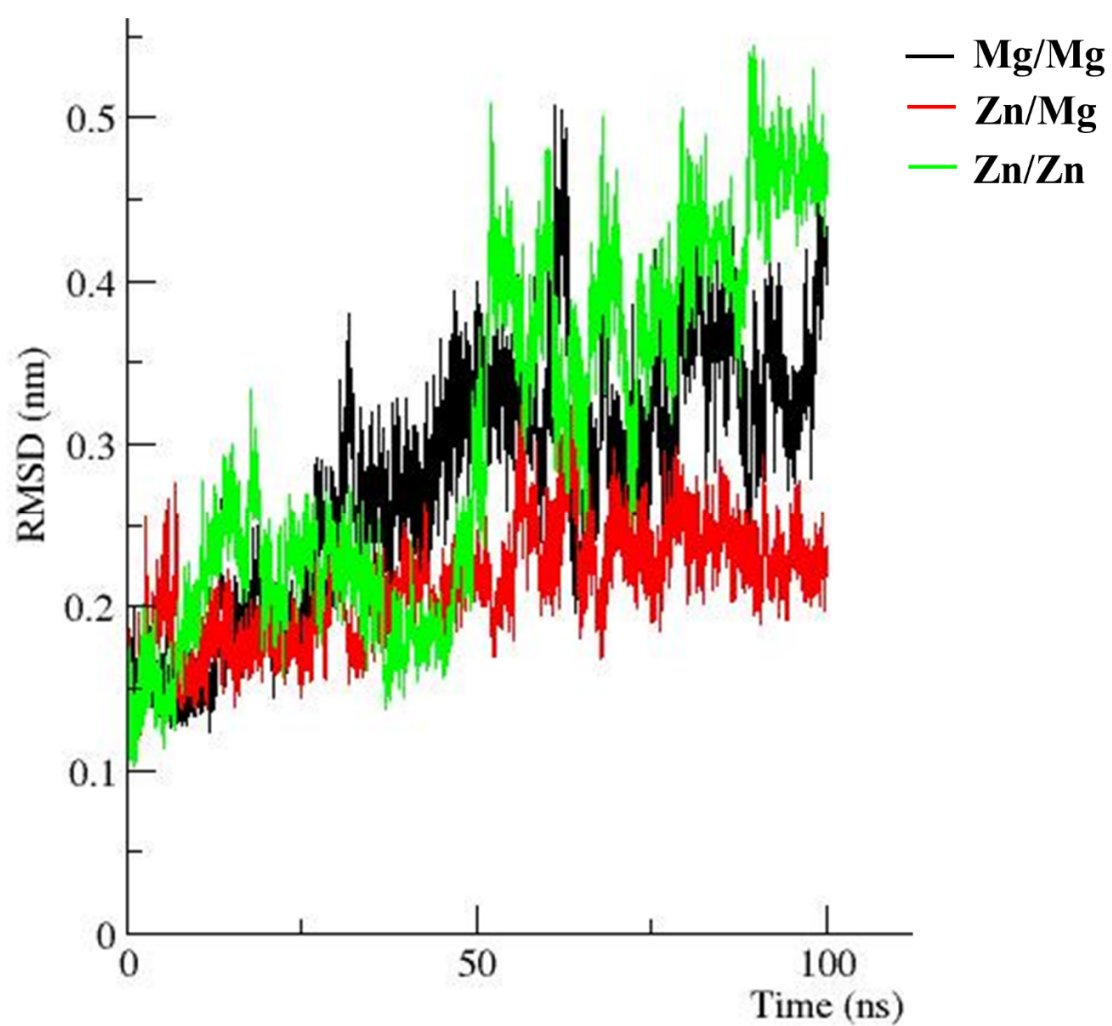

Figure S8. C-alpha RMSD plot of PDE-9 (Mg/Mg, Zn/Mg, Zn/Zn) in complexed with compound-5.

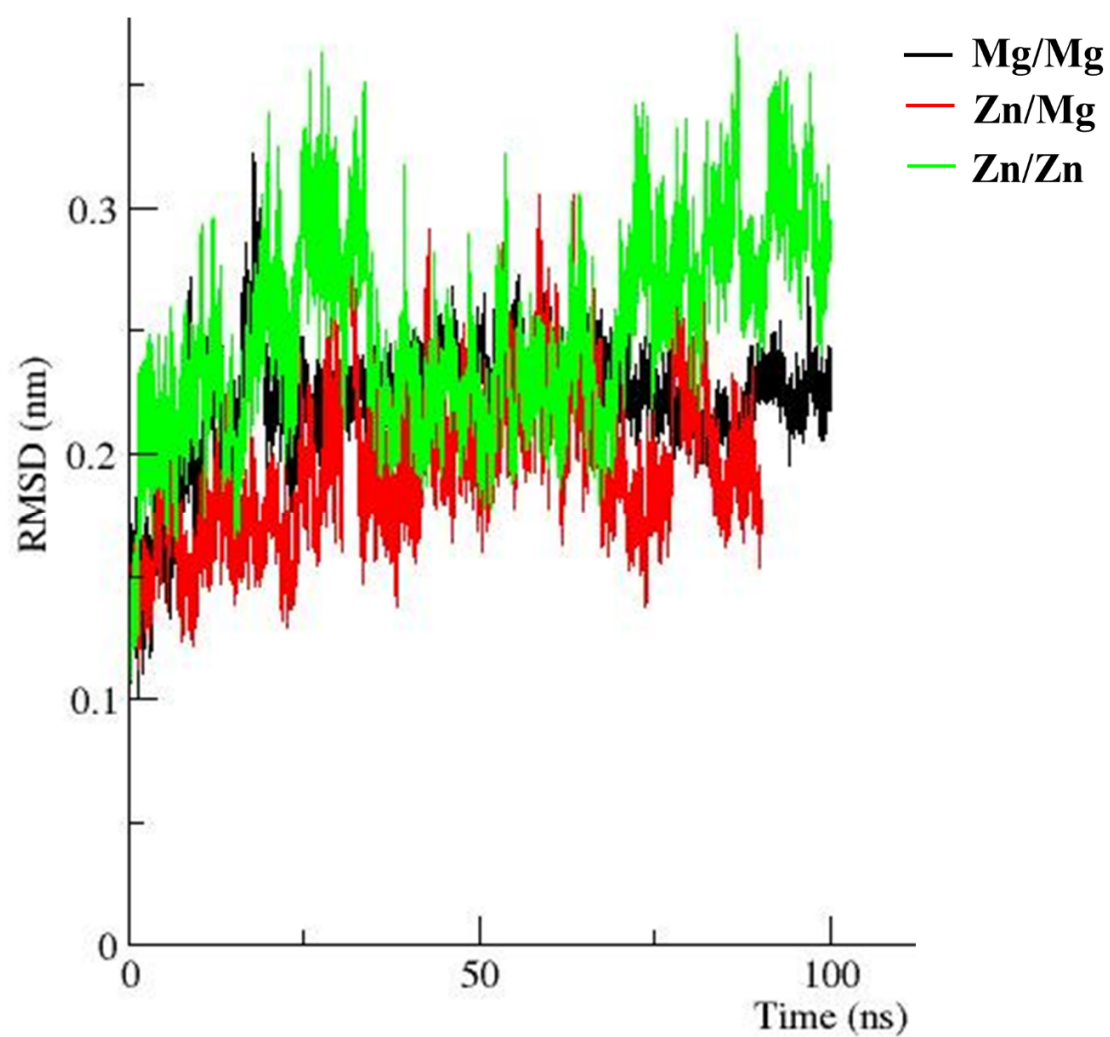

**Figure S9.** C-alpha RMSD plot of PDE-9 (Mg/Mg, Zn/Mg, Zn/Zn) in complexed with compound-6.

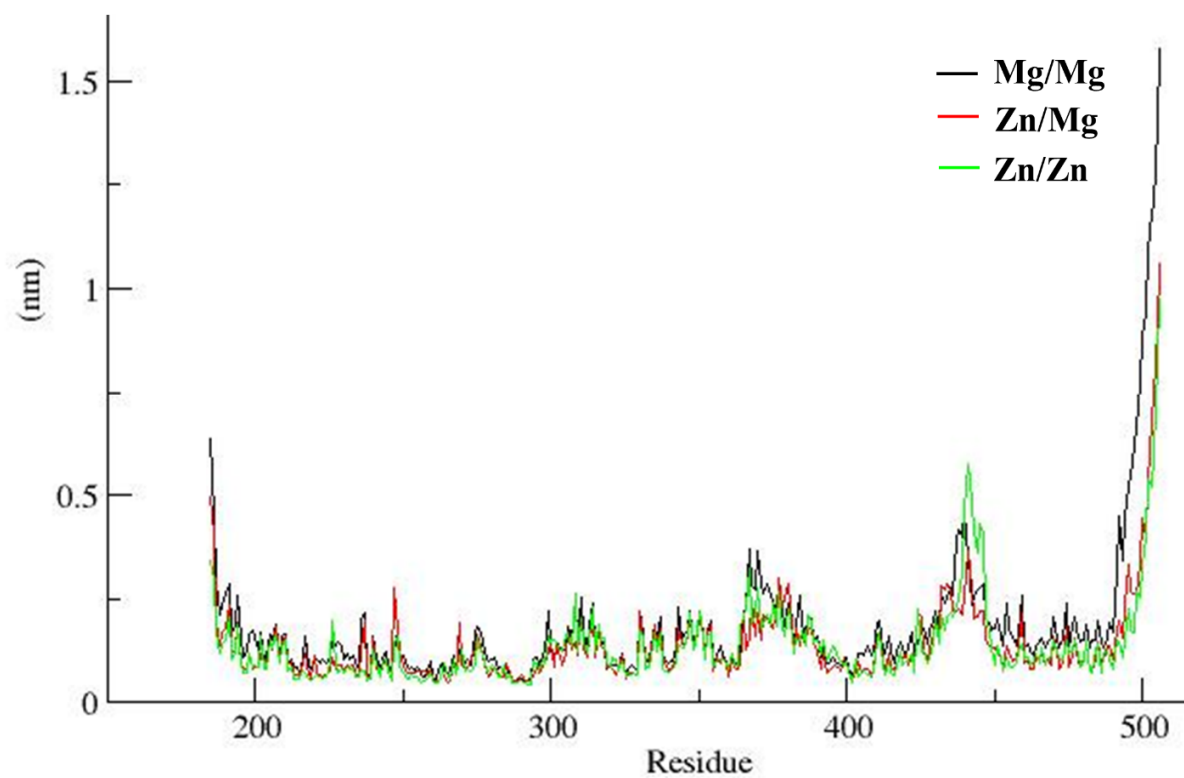

**Figure S10. Protein RMSF plot of PDE-9 (Mg/Mg, Zn/Mg, Zn/Zn) in complexed with compound-6.**

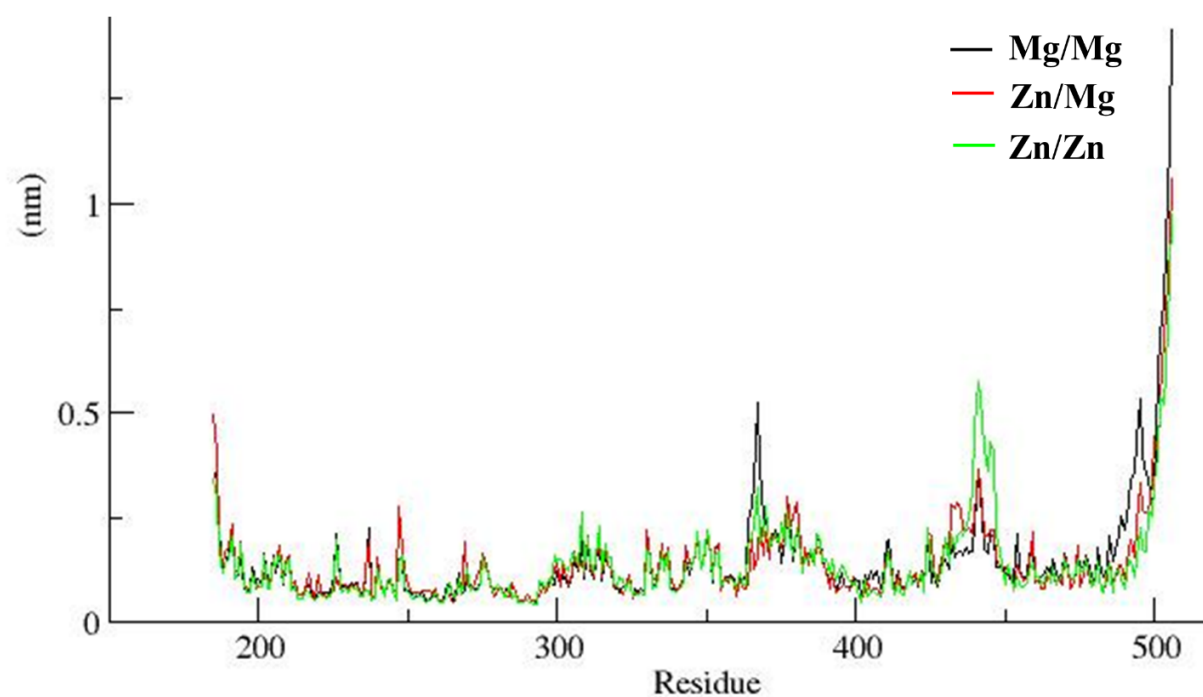

**Figure S11. Protein RMSF plot of PDE-9 (Mg/Mg, Zn/Mg, Zn/Zn) in complexed with compound-6.**



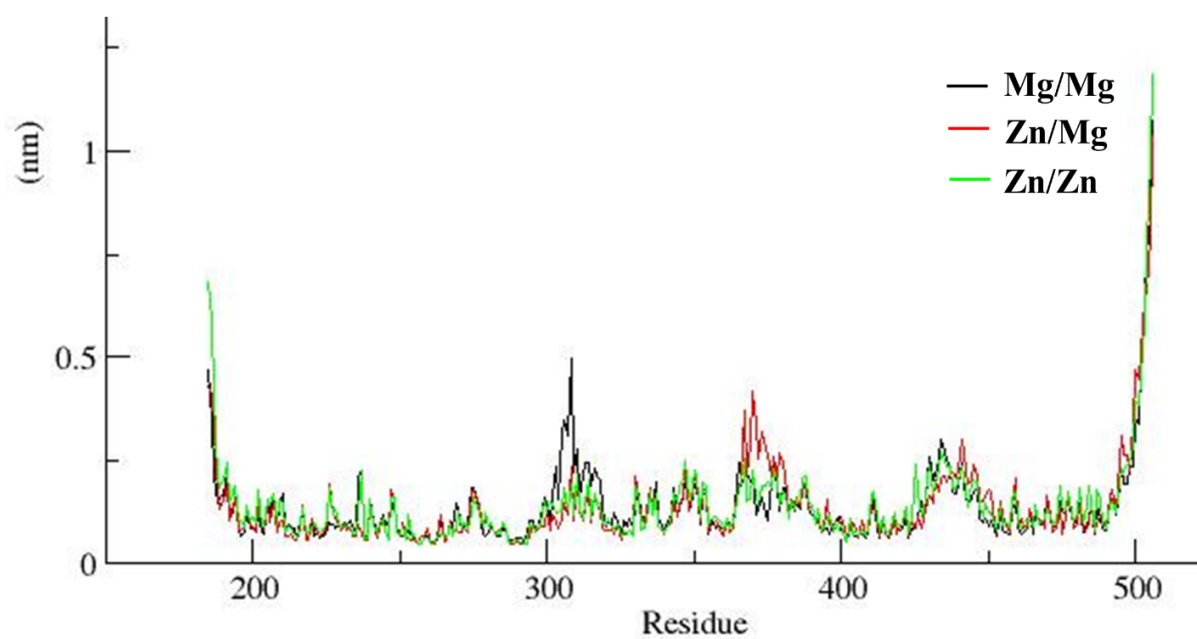

**Figure S12. Protein RMSF plot of PDE-9 (Mg/Mg, Zn/Mg, Zn/Zn) in complexed with compound-6.**

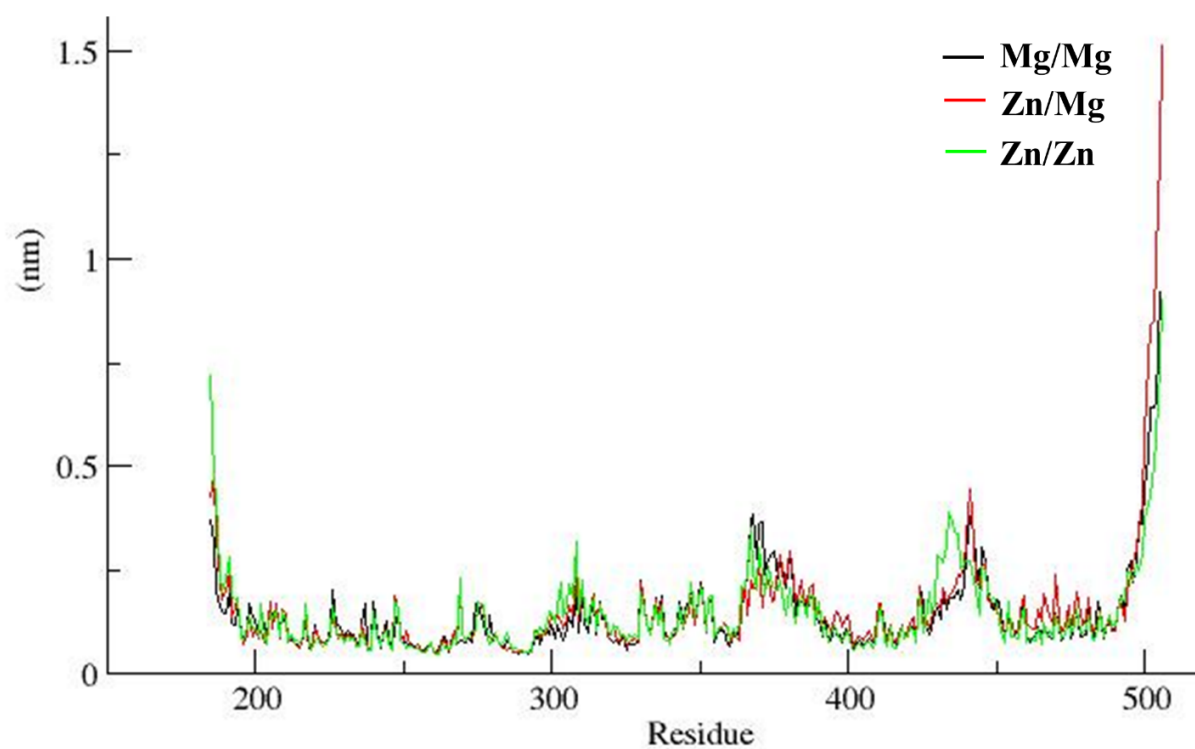

**Figure S13. Protein RMSF plot of PDE-9 (Mg/Mg, Zn/Mg, Zn/Zn) in complexed with compound-6.**

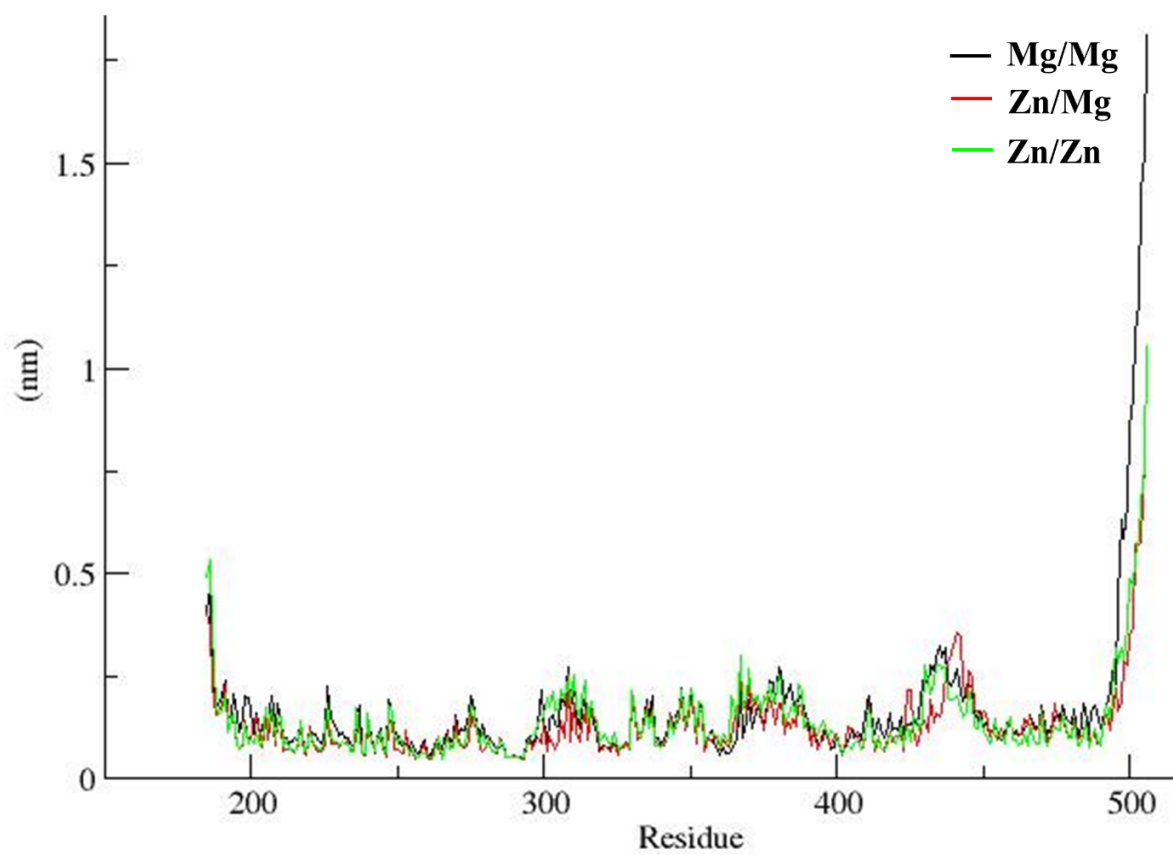

**Figure S14. Protein RMSF plot of PDE-9 (Mg/Mg, Zn/Mg, Zn/Zn) in complexed with compound-6.**

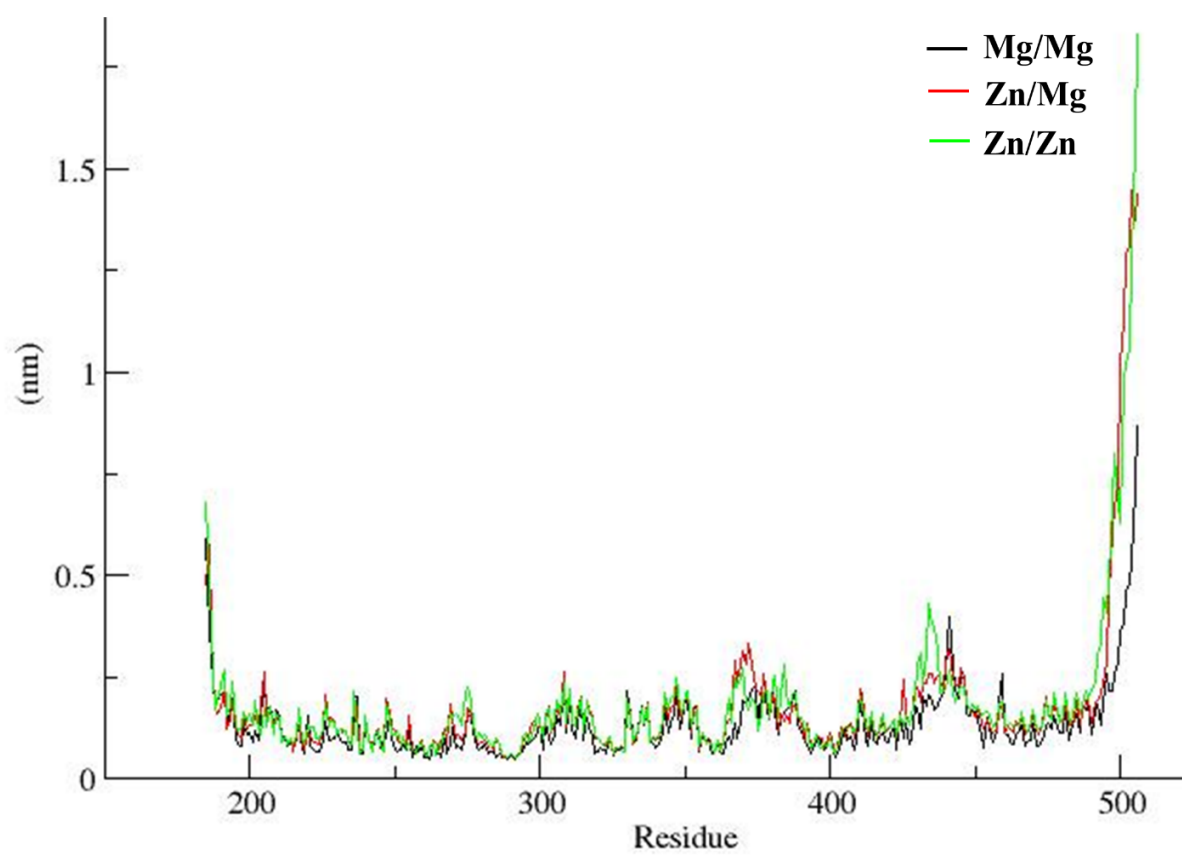

**Figure S15. Protein RMSF plot of PDE-9 (Mg/Mg, Zn/Mg, Zn/Zn) in complexed with compound-6.**

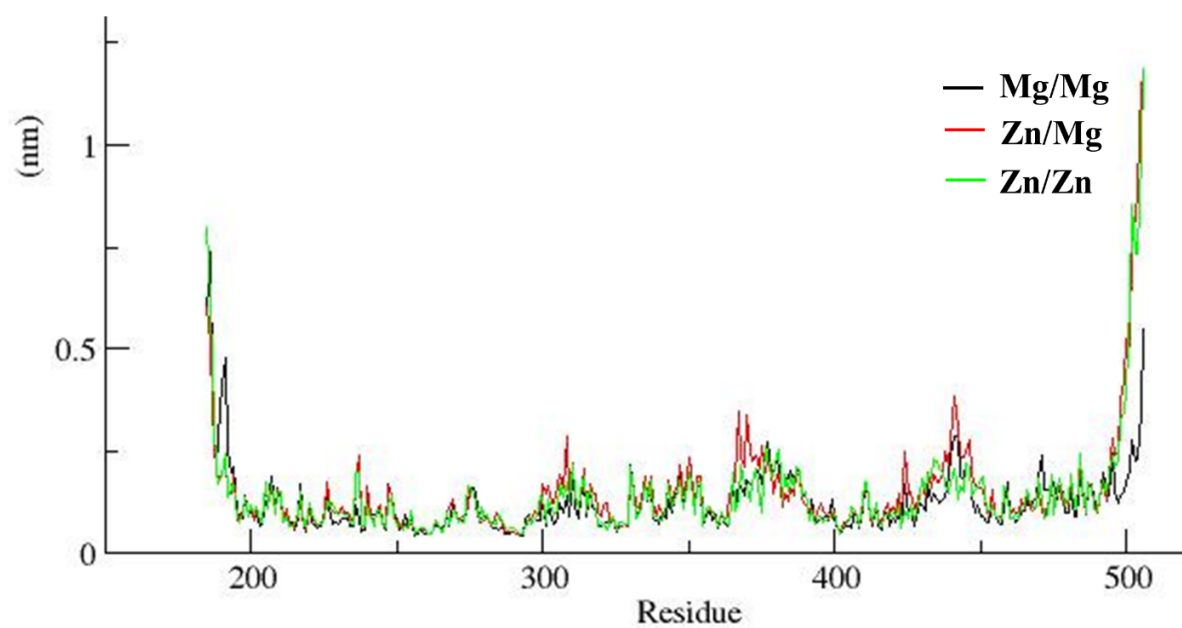

**Figure S16. Protein RMSF plot of PDE-9 (Mg/Mg, Zn/Mg, Zn/Zn) in complexed with compound-6.**

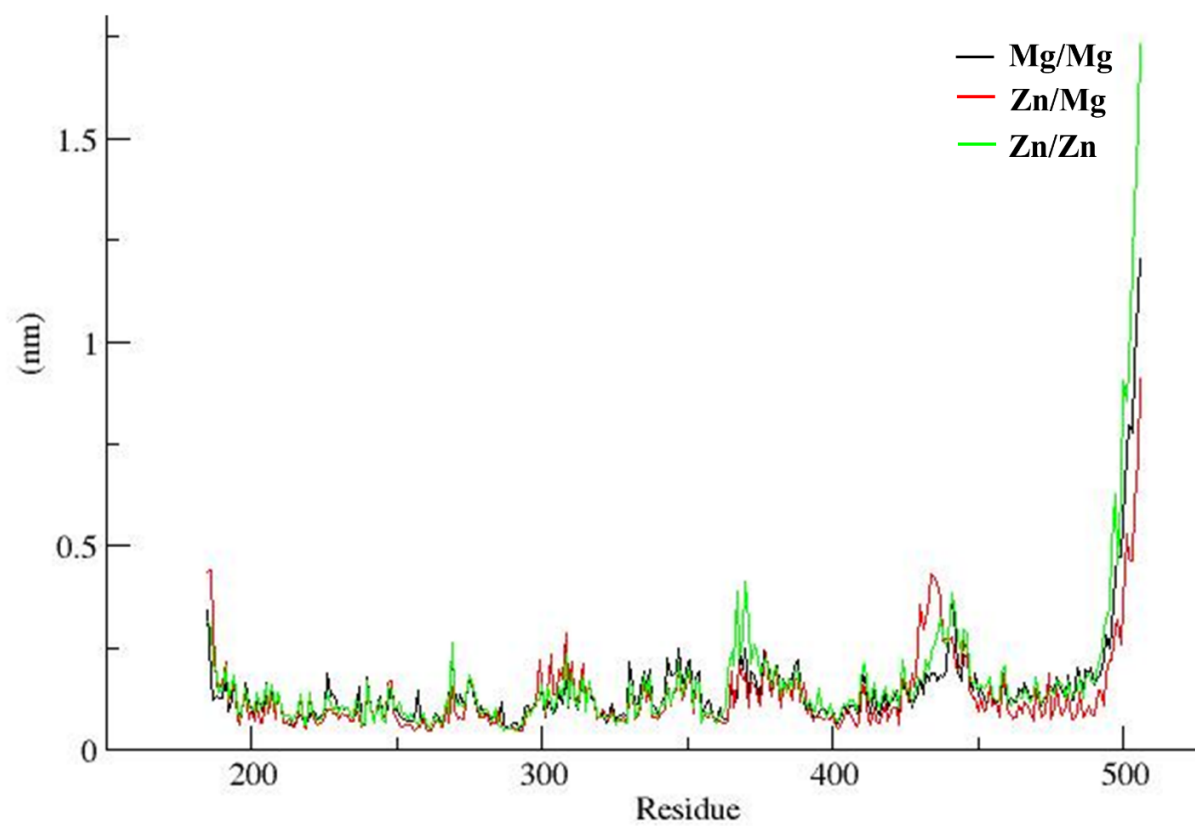

**Figure S17.** Protein RMSF plot of PDE-9 (Mg/Mg, Zn/Mg, Zn/Zn) in complexed with compound-6.

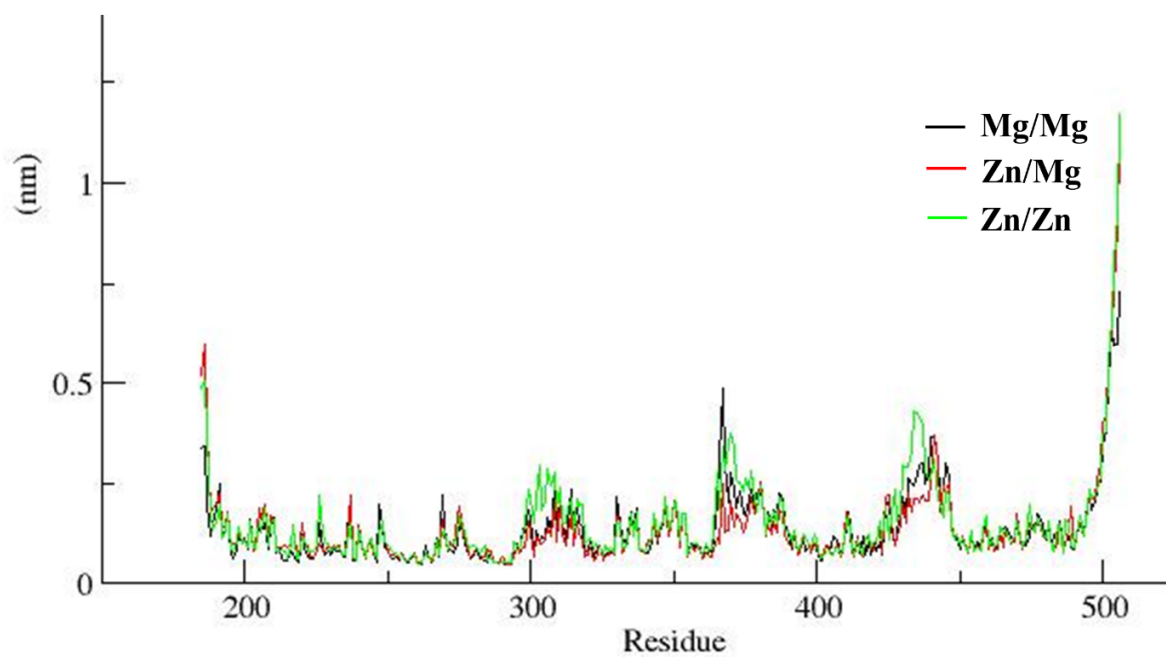

**Figure S18.** Protein RMSF plot of PDE-9 (Mg/Mg, Zn/Mg, Zn/Zn) in complexed with compound-6.

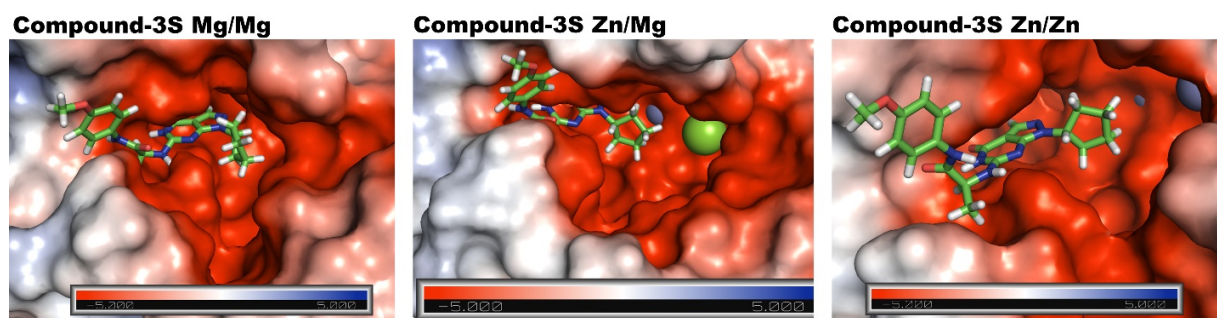

**Figure S19. Electrostatic interaction map using APBS calculation for the Compound-3S in all three different metal systems (Mg/Mg, Zn/Mg, Zn/Zn).**



**Compound-6 Mg/Mg**

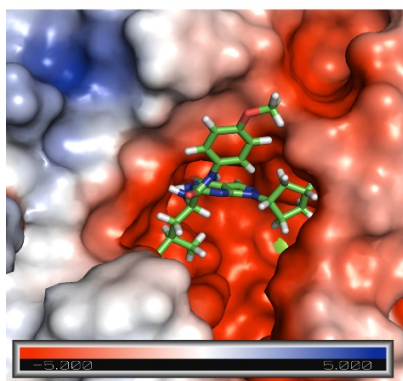

**Compound-6 Zn/Mg**

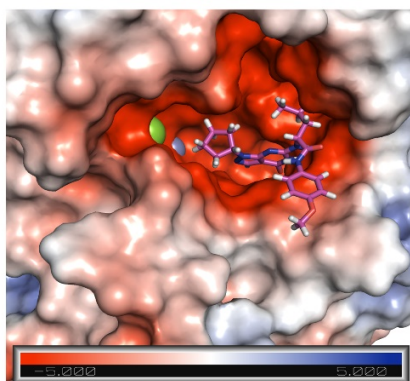

**Compound-6 Zn/Zn**

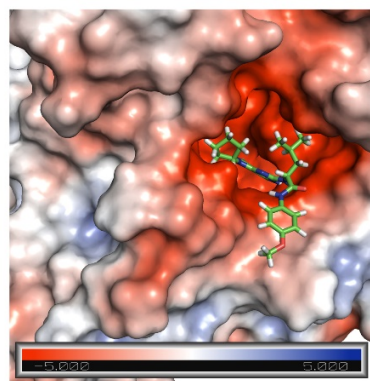

**Figure S20. Electrostatic interaction map using APBS calculation for the Compound-6 in all three different metal systems (Mg/Mg, Zn/Mg, Zn/Zn).**
